# Supplementary material for: Physiological and Proteomic Analyses of Saccharum spp. Grown under Salt Stress
Source: PubMed Central journal article supplement (PMC4043529; doi:10.1371/journal.pone.0098463), 2014-06-03
Supplement: pone.0098463.s001.pdf [file pone.0098463.s001.pdf]

Figure S1

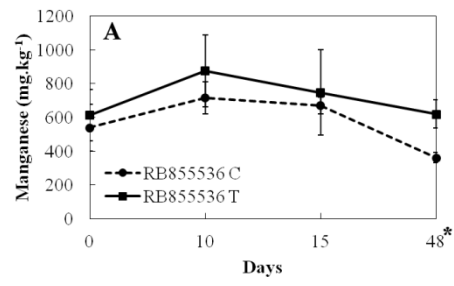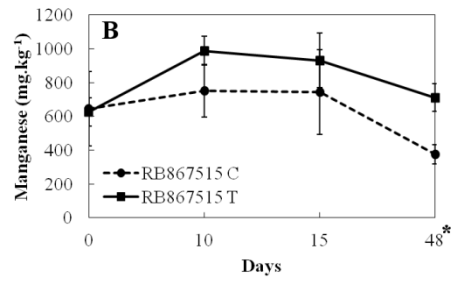

Figure S2

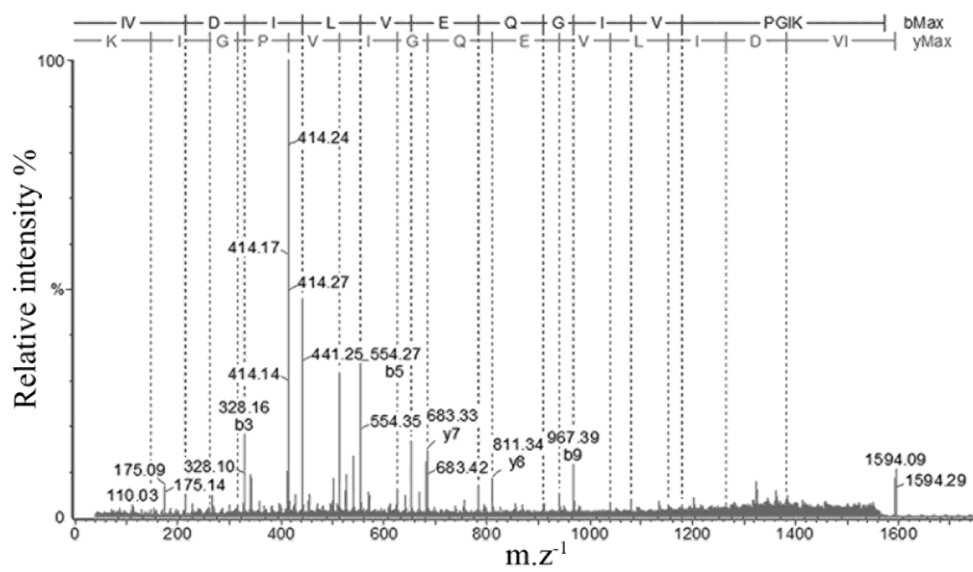

Figure S3

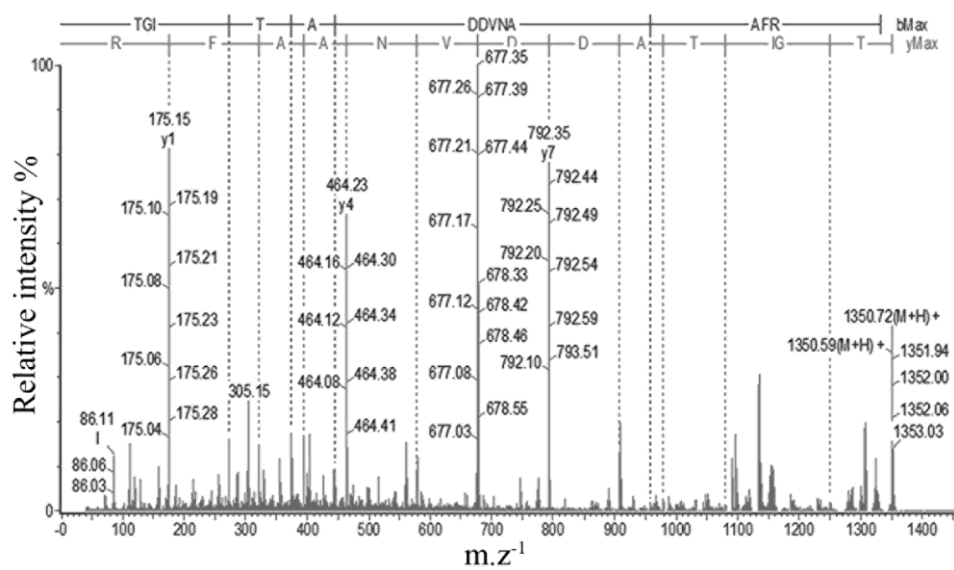

Figure S4

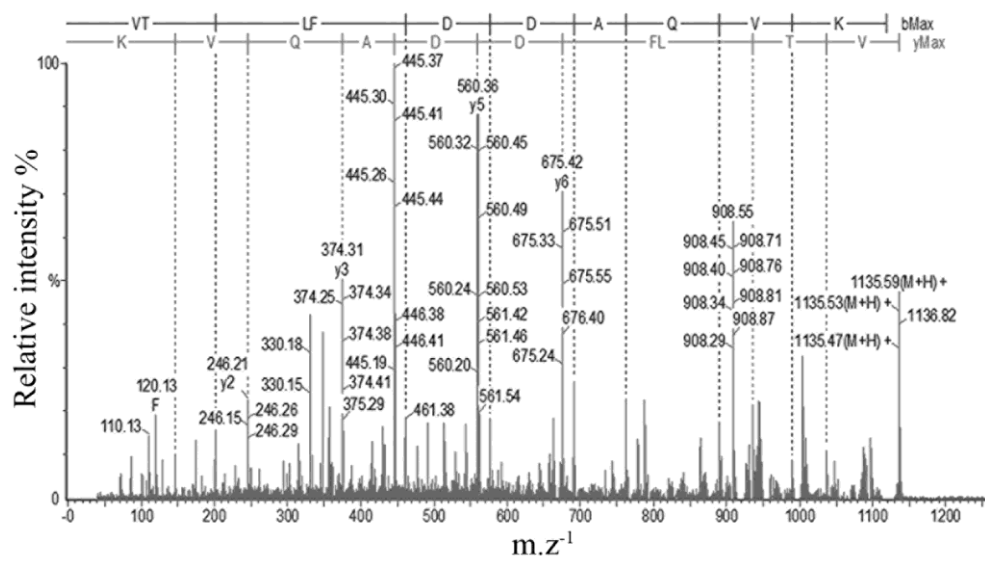

Figure S5

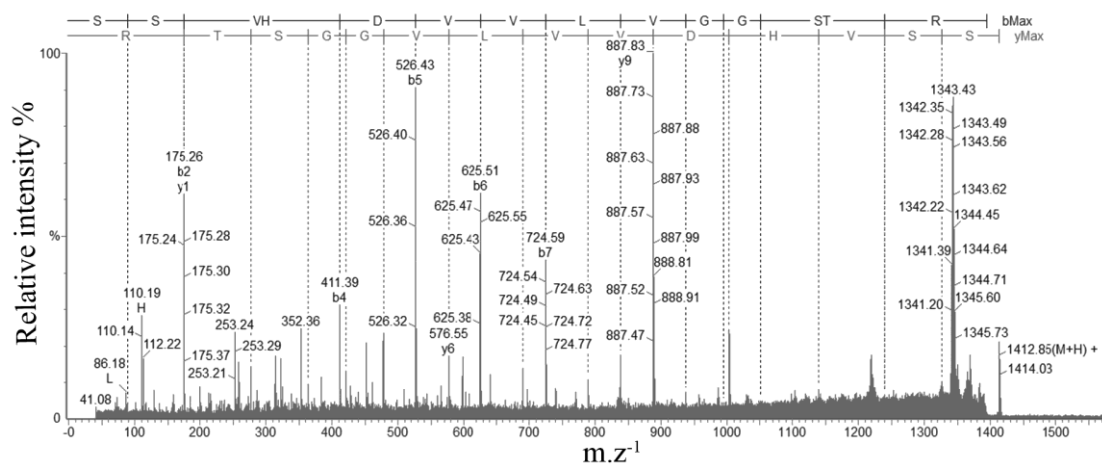

Figure S6

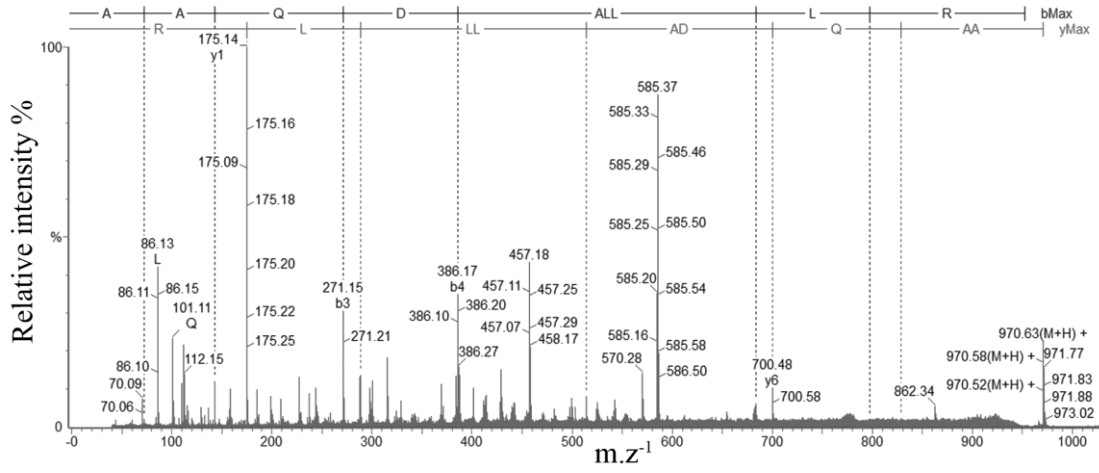

Figure S7

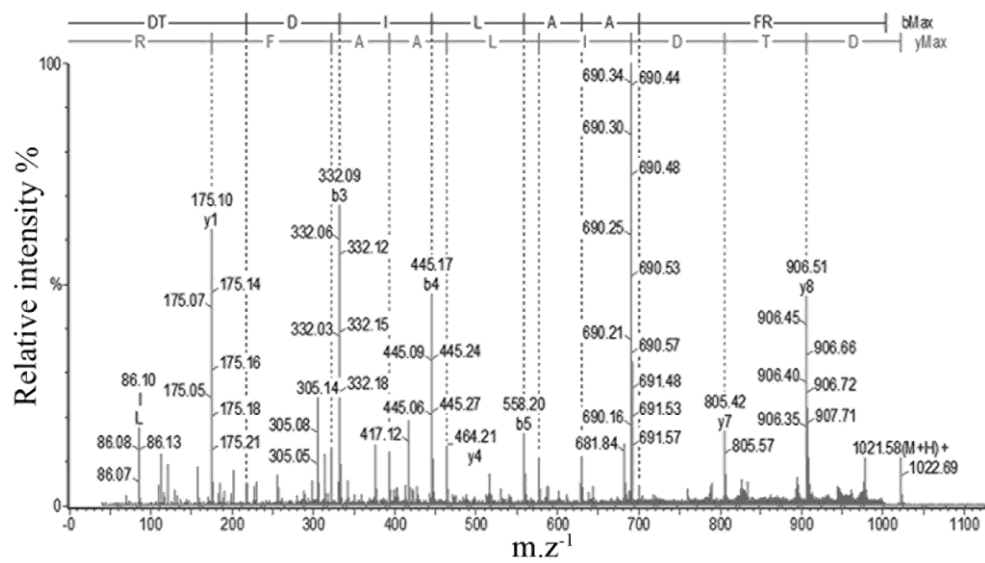

Figure S8

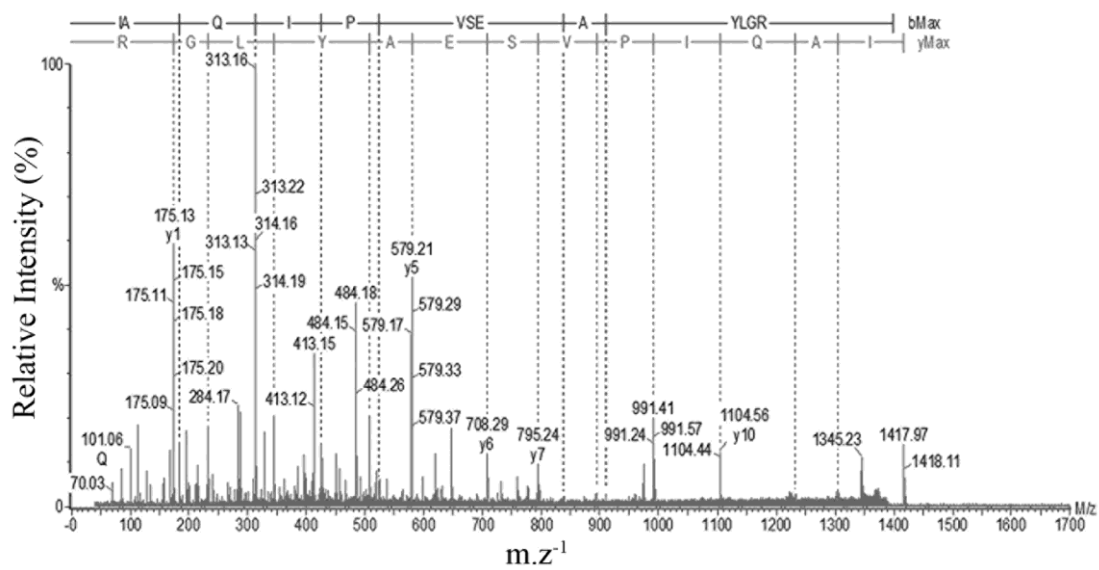



Figure S9

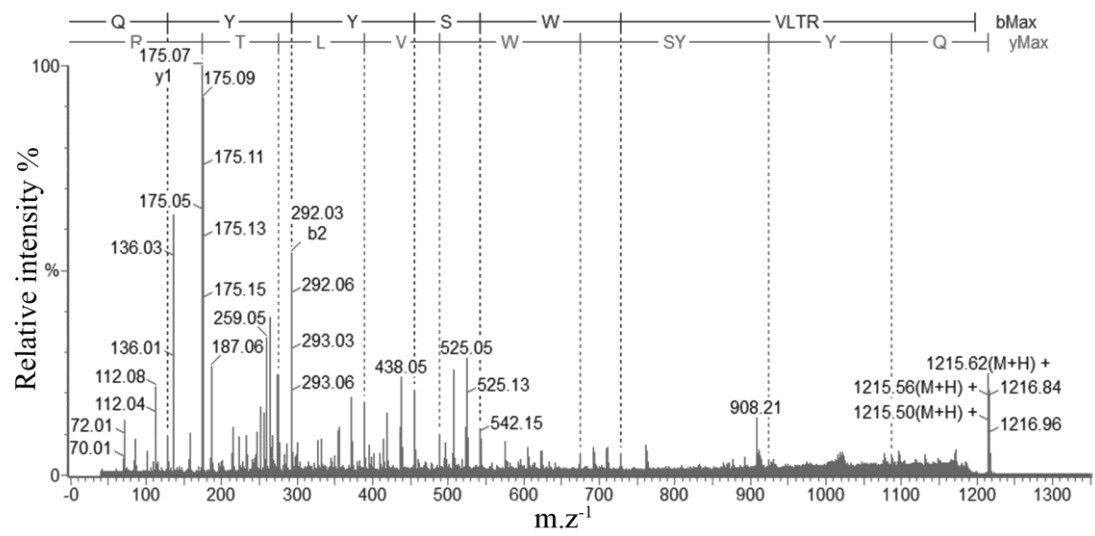



Figure S11

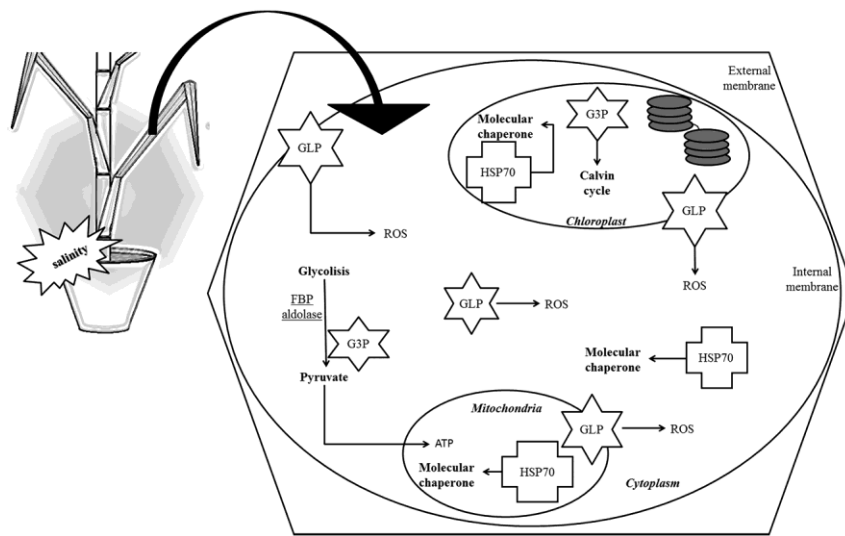

Figure S12

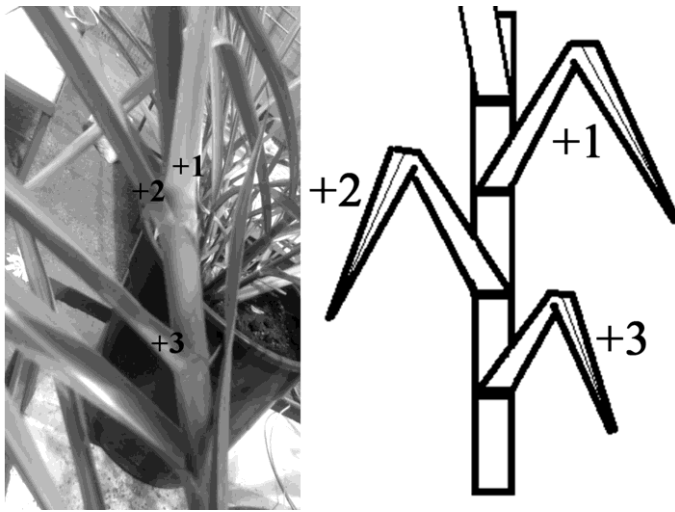

Figure S13

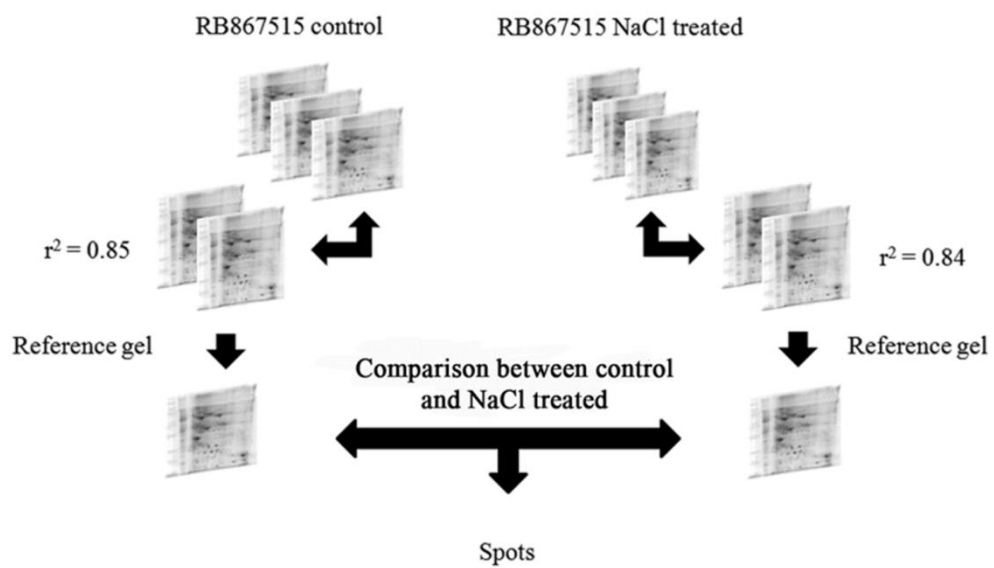

## Supporting Information Legends

**Figure S1.** Manganese concentration in sugarcane leaves ( $\text{mg.kg}^{-1}$ ) of cultivar RB855563 (A) and cultivar RB867515 (B) at various timepoints. “●” are control plants and “■” are salt-treated plants; Values are presented as mean  $\pm$  SD (n = 6). \* Significant at  $p \leq 0.05$ .

**Figure S2.** MALDI-ToF/ToF spectrum sequence of fructose 1,6-bisphosphate aldolase (1) of cultivar RB867515 sugarcane leaves treated with 100 mM NaCl for 48 days.

**Figure S3.** MALDI-ToF/ToF spectrum sequence of glyceraldehyde 3-P-dehydrogenase (2) of cultivar RB867515 sugarcane leaves treated with 100 mM NaCl for 48 days.

**Figure S4.** MALDI-ToF/ToF spectrum sequence of germin-like protein (3) of cultivar RB867515 sugarcane leaves treated with 100 mM NaCl for 48 days.

**Figure S5.** MALDI-ToF/ToF spectrum sequence of heat shock protein 70 (HSP 70) (4) of cultivar RB867515 sugarcane leaves treated with 100 mM NaCl for 48 days.

**Figure S6.** MALDI-ToF/ToF spectrum sequence of fructose 1,6-bisphosphate aldolase of cultivar RB867515 sugarcane leaves treated with 100 mM NaCl for 48 days

**Figure S7.** MALDI-ToF/ToF spectrum sequence of RUBISCO of cultivar RB867515 sugarcane leaves treated with 100 mM NaCl for 48 days.

**Figure S8.** MALDI-ToF/ToF spectrum sequence of ATP synthase subunit  $\alpha$  of cultivar RB867515 sugarcane leaves treated with 100 mM NaCl for 48 days.

**Figure S9.** MALDI-ToF/ToF spectrum sequence of 23 kDa photosystem II of cultivar RB867515 sugarcane leaves treated with 100 mM NaCl for 48 days.

**Figure S10.** MALDI-ToF/ToF spectrum sequence of 23 kDa photosystem II of cultivar RB867515 sugarcane leaves treated with 100 mM NaCl for 48 days.

**Figure S11.** Schematic diagram of identified proteins in sugarcane leaves proteome in response to salinity stress. Proteins in stars: up-regulated under saline conditions (100 mM NaCl). Proteins in crosses: expressed only in salt-treated plants under saline conditions (100 mM NaCl). Proteins underlined: down-regulated under saline conditions (100 mM NaCl). Arrows: putative influences on metabolic processes.

**Figure S12.** Sugarcane leaves numbering system proposed by Kuijper (1915), with modifications. Leaves +1 +2 +3 are fully expanded and photosynthetically active.

**Figure S13.** Experimental design for comparison and selection of proteins differentially expressed between replicates of control and salt-treated plant gels of sugarcane cultivar RB867515.
